# Supplementary material for: A new krypton complex – experimental and computational investigation of the krypton sulphur pentafluoride cation, [KrSF5]+, in the gas phase
Source: Royal Society of Chemistry journal article supplement (doi:10.1039/d1cp05814b), 2022-01-01
Supplement: d1cp05814b1.pdf [file d1cp05814b1.pdf]

## Supplementary information

### **A new krypton complex – Experimental and computational investigation of the krypton sulphur pentafluoride cation, $[\text{KrSF}_5]^+$ , in the gas phase**

Sandrina Oliveira,<sup>1</sup> Nuno A. G. Bandeira,<sup>2,\*</sup> João P. Leal,<sup>1</sup> Leonor Maria,<sup>1</sup> José M. Carretas,<sup>1</sup> Bernardo Monteiro,<sup>1</sup> Joaquim Marçalo<sup>1,\*</sup>

<sup>1</sup> Centro de Química Estrutural, Institute of Molecular Sciences, Instituto Superior Técnico, Universidade de Lisboa, Estrada Nacional 10, 2695-066 Bobadela LRS, Portugal

<sup>2</sup> BioISI, Faculdade de Ciências, Universidade de Lisboa, Campo Grande, 1749-016 Lisboa, Portugal

\*Email: [jmarcalo@ctn.tecnico.ulisboa.pt](mailto:jmarcalo@ctn.tecnico.ulisboa.pt); [nuno.bandeira@ciencias.ulisboa.pt](mailto:nuno.bandeira@ciencias.ulisboa.pt)

## Contents

**Figure S1** – Kinetic plot for a reaction of isolated, thermalised  $\text{Kr}^+$  with  $\text{SF}_6$

**Figure S2** – Mass spectra of a 0.5 s reaction of isolated, thermalised  $\text{Kr}^+$  with  $\text{SF}_6$  at two different Ar pressures.

**Figure S3** – Mass spectra of the reaction of isolated, thermalised  $\text{Kr}^+$  with  $\text{NF}_3$ .

**Table S1** – Final coordinates and energy ( $E_h$ , BCCD(T)) from single point energy calculations on geometry optimised structures (MP2) reported in this study.

**Figure S4** – Mulliken charges in  $[\text{KrSF}_6]^+$  computed at the MP2/def2-TZVPP level.

**Figure S5** – Mulliken charges in  $[\text{KrSF}_5]^+$  (Conformer 1) computed at the MP2/def2-TZVPP level.

**Figure S6** – Mulliken charges in  $[\text{KrSF}_5]^+$  (Conformer 2) computed at the MP2/def2-TZVPP level.

**Figure S7** – Mulliken charges in  $[\text{XeSF}_6]^+$  computed at the MP2/def2-TZVPP level.

**Figure S8** – Mulliken charges in  $[\text{XeSF}_5]^+$  (Conformer 1) computed at the MP2/def2-TZVPP level.

**Figure S9** – Mulliken charges in  $[\text{XeSF}_5]^+$  (Conformer 2) computed at the MP2/def2-TZVPP level.

**Table S2** – Enthalpies and Gibbs energies of reaction (kcal/mol) computed by MP2 and BCCD(T) methods for  $\text{Ng}^+ + \text{SF}_6$ .

**Table S3** – Thermochemical calculations for  $\text{HXF}_n^+ \rightarrow \text{XF}_{n-1}^+ + \text{HF}$  ( $X = \text{S}$ ,  $n = 6$ ;  $X = \text{N}$ ,  $n = 3$ ;  $X = \text{Si}$ ,  $n = 4$ ).

**Figure S10** – Energy density map of the  $[\text{KrSF}_6]^+$  species with (3,+1) Hamiltonian critical points signalled as orange dots.

**Figure S11** – Potential energy surface map along with the Kr-F distance coordinate in  $[\text{KrSF}_6]^+$  including spin-orbit coupling.

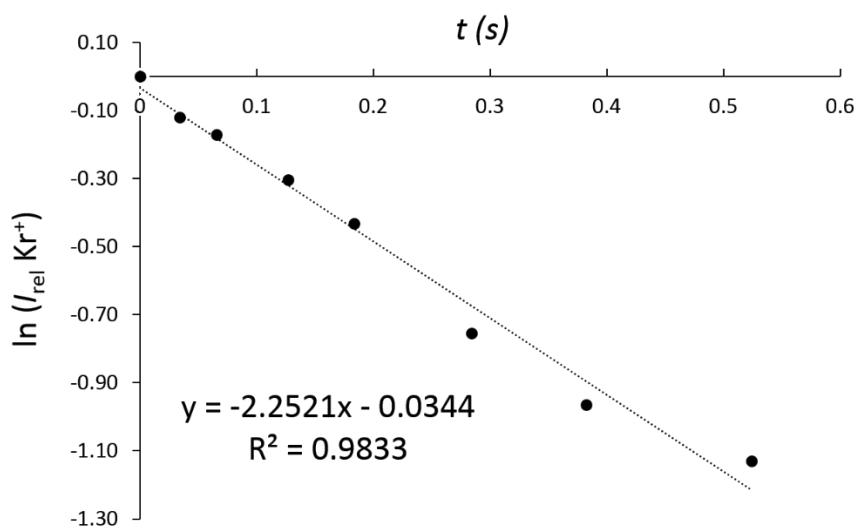

Figure S1 – Kinetic plot for a reaction of isolated, thermalised  $\text{Kr}^+$  with  $\text{SF}_6$ .

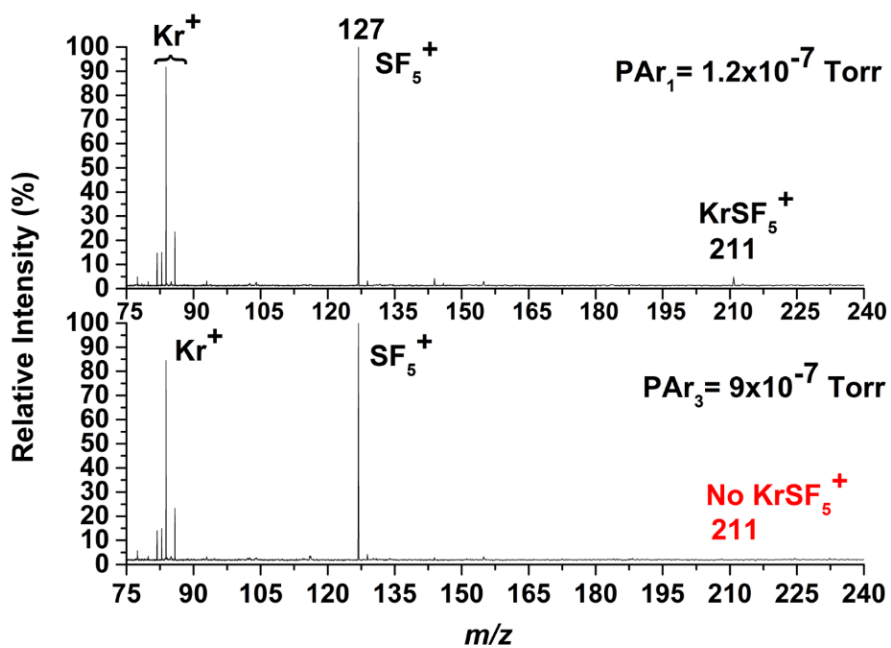

Figure S2 – Mass spectra of a 0.5 s reaction of isolated, thermalised  $\text{Kr}^+$  with  $\text{SF}_6$  at two different Ar pressures.

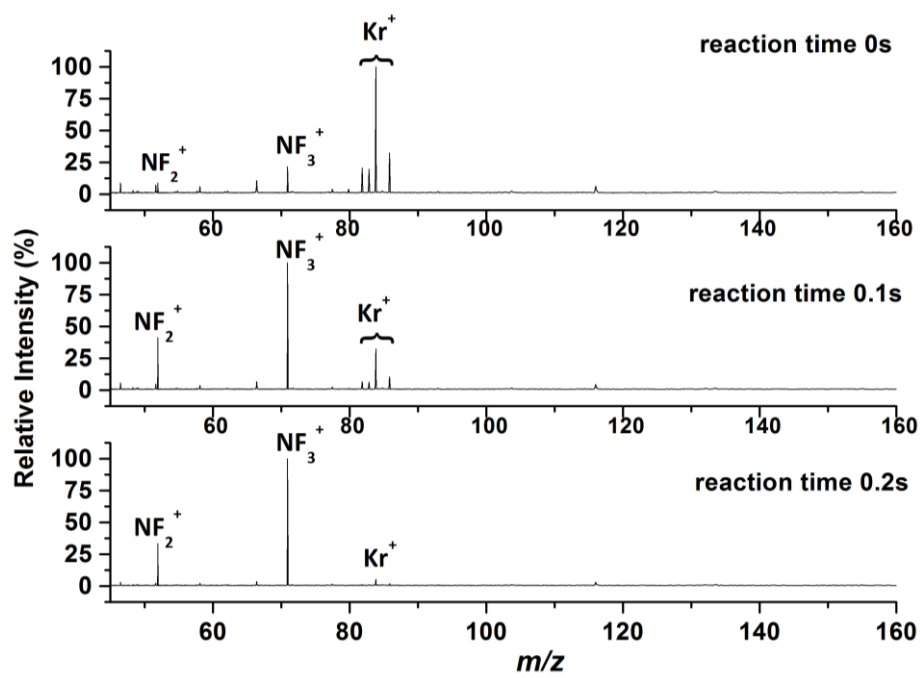

**Figure S3** – Mass spectra of the reaction of isolated, thermalised  $\text{Kr}^+$  with  $\text{NF}_3$ .

**Table S1** – Final coordinates and energy ( $E_h$ , BCCD(T)) from single point energy calculations on geometry optimised structures (MP2) reported in this study.

| <b>KrSF<sub>6</sub><sup>+</sup></b>           |              |              |              | <b>XeSF<sub>6</sub><sup>+</sup></b>           |              |              |              |
|-----------------------------------------------|--------------|--------------|--------------|-----------------------------------------------|--------------|--------------|--------------|
| -3747.9 $E_h$ (-2351827.7 kcal/mol)           |              |              |              | -1324.2 $E_h$ (-830948.22 kcal/mol)           |              |              |              |
| S                                             | -0.058078000 | -0.095547000 | 0.058321000  | S                                             | 0.082680000  | 0.091591000  | 0.071651000  |
| F                                             | 0.078799000  | -0.349799000 | 1.565504000  | F                                             | -0.196430000 | -1.372323000 | -0.284224000 |
| F                                             | 0.226768000  | 0.425211000  | -1.387679000 | F                                             | -0.030446000 | -0.176731000 | 1.588161000  |
| F                                             | 1.432607000  | 0.311088000  | 0.003174000  | F                                             | -1.440671000 | 0.449177000  | 0.022462000  |
| F                                             | 1.581896000  | -0.235605000 | 0.173545000  | F                                             | 0.366306000  | 1.688155000  | 0.436330000  |
| F                                             | -0.376291000 | 1.649213000  | 0.581237000  | F                                             | 1.609435000  | -0.133914000 | 0.125384000  |
| F                                             | 0.186319000  | -1.530270000 | -0.350957000 | F                                             | 0.196269000  | 0.491984000  | -1.437658000 |
| Kr                                            | 0.544679000  | 3.394709000  | -0.374871000 | Xe                                            | -0.586170000 | 3.863968000  | -0.576030000 |
| <b>KrSF<sub>5</sub><sup>+</sup> (Conf. 1)</b> |              |              |              | <b>XeSF<sub>5</sub><sup>+</sup> (Conf. 1)</b> |              |              |              |
| -3648.232 $E_h$ (-2289300.13 kcal/mol)        |              |              |              | -1224.471 $E_h$ (-768322.76 kcal/mol)         |              |              |              |
| S                                             | 0.001384000  | 0.563744000  | -0.036476000 | S                                             | 0.000000000  | -0.099606000 | -0.089783000 |
| F                                             | 0.005436000  | 0.259726000  | 1.464264000  | F                                             | -0.000001000 | -0.338902000 | 1.385426000  |
| F                                             | -0.002396000 | 0.854156000  | -1.540425000 | F                                             | 0.000001000  | -1.280397000 | -1.005991000 |
| F                                             | 1.320951000  | -0.123485000 | -0.176551000 | F                                             | 1.531385000  | -0.097412000 | -0.099736000 |
| F                                             | -1.291257000 | -0.172321000 | -0.179404000 | F                                             | -1.531385000 | -0.097412000 | -0.099739000 |
| F                                             | -0.026366000 | 2.029850000  | 0.253320000  | F                                             | 0.000001000  | 1.308687000  | -0.591146000 |
| Kr                                            | 0.071969000  | -3.293022000 | -0.293879000 | Xe                                            | -0.000002000 | 0.540428000  | -4.093606000 |
| <b>KrSF<sub>5</sub><sup>+</sup> (Conf. 2)</b> |              |              |              | <b>XeSF<sub>5</sub><sup>+</sup> (Conf. 2)</b> |              |              |              |
| -3648.231 $E_h$ (-2289299.5 kcal/mol)         |              |              |              | -1224.469 $E_h$ (-768365.89 kcal/mol)         |              |              |              |
| S                                             | 0.001915000  | 0.348898000  | 0.121476000  | S                                             | 0.001698000  | 0.351754000  | 0.145057000  |
| F                                             | 0.003954000  | -0.765396000 | 1.118644000  | F                                             | -0.003485000 | -0.753388000 | 1.152595000  |
| F                                             | 0.011377000  | 0.043886000  | -1.341310000 | F                                             | 0.009797000  | 0.034048000  | -1.314981000 |
| F                                             | 1.533329000  | 0.349813000  | 0.132373000  | F                                             | 1.533288000  | 0.352453000  | 0.155016000  |
| F                                             | -1.529505000 | 0.348452000  | 0.112813000  | F                                             | -1.529898000 | 0.351497000  | 0.138194000  |
| F                                             | -0.001704000 | 1.768908000  | 0.590100000  | F                                             | -0.001246000 | 1.775909000  | 0.601204000  |
| Kr                                            | -0.011457000 | -0.565157000 | -4.599097000 | Xe                                            | -0.010155000 | -0.582869000 | -4.742085000 |

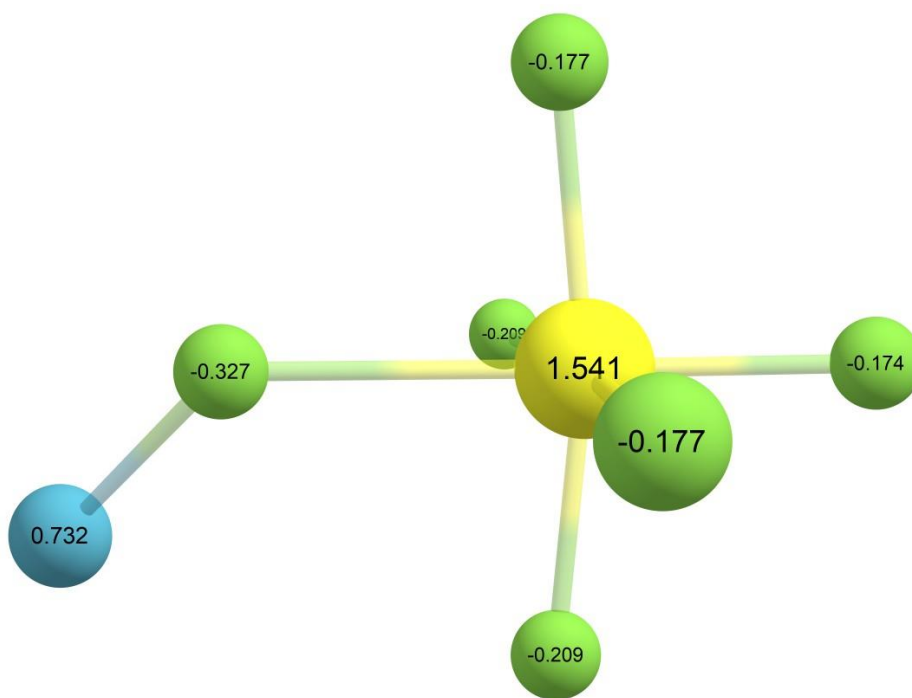

**Figure S4** – Mulliken charges in [KrSF<sub>6</sub>]<sup>+</sup> computed at the MP2/def2-TZVPP level.

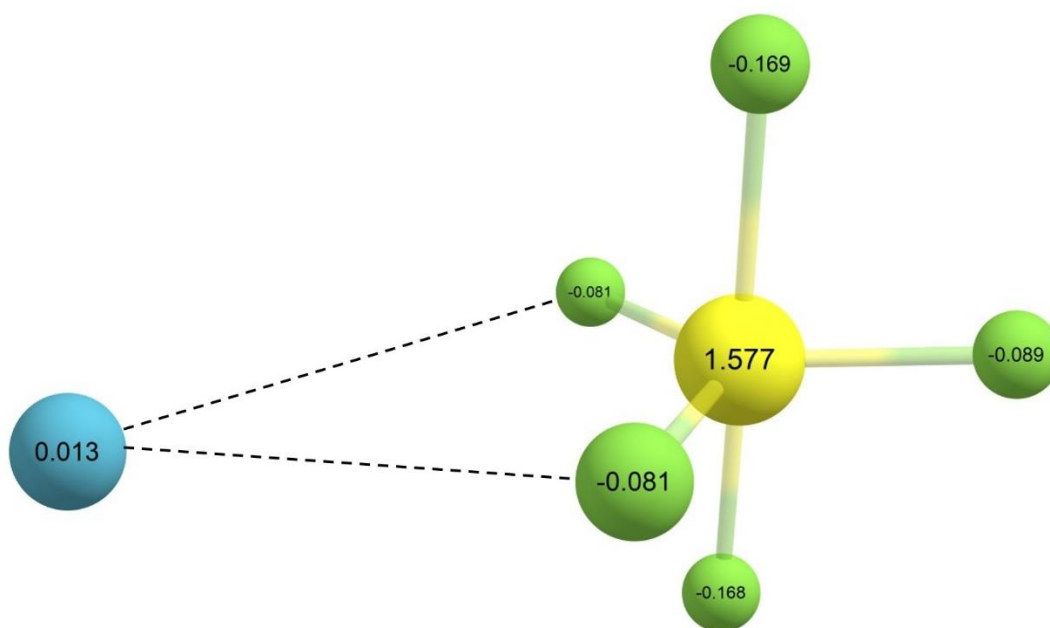

**Figure S5** – Mulliken charges in [KrSF<sub>5</sub>]<sup>+</sup> (Conformer 1) computed at the MP2/def2-TZVPP level.

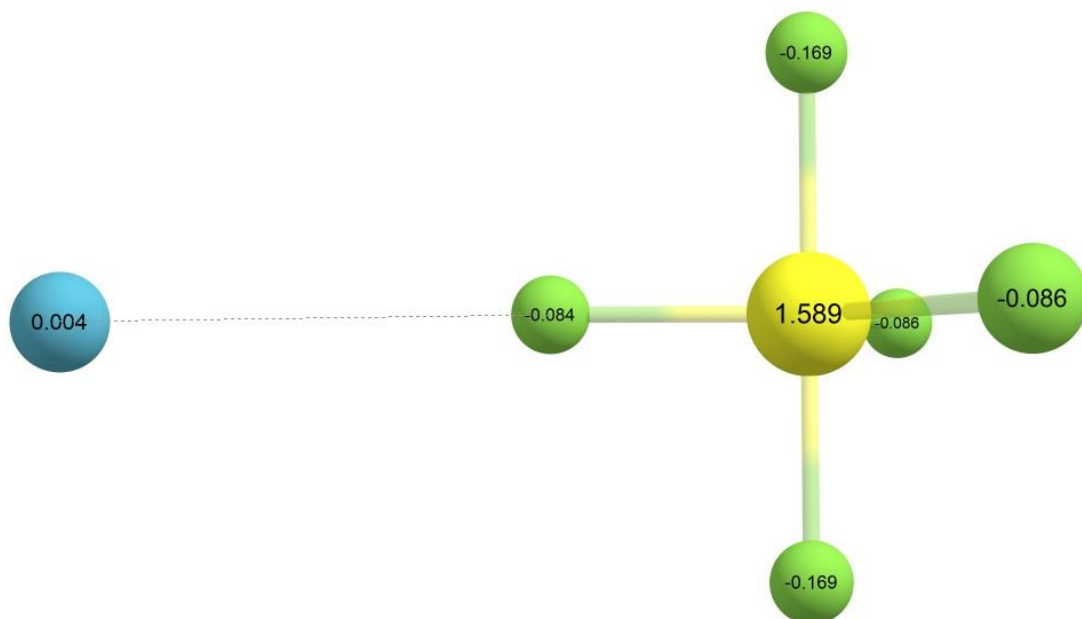

**Figure S6** – Mulliken charges in [KrSF<sub>5</sub>]<sup>+</sup> (Conformer 2) computed at the MP2/def2-TZVPP level.

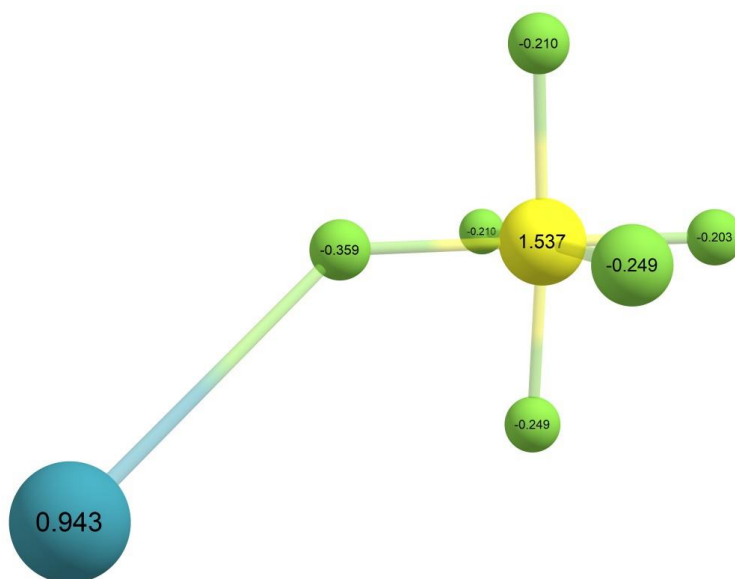

**Figure S7** – Mulliken charges in [XeSF<sub>6</sub>]<sup>+</sup> computed at the MP2/def2-TZVPP level.

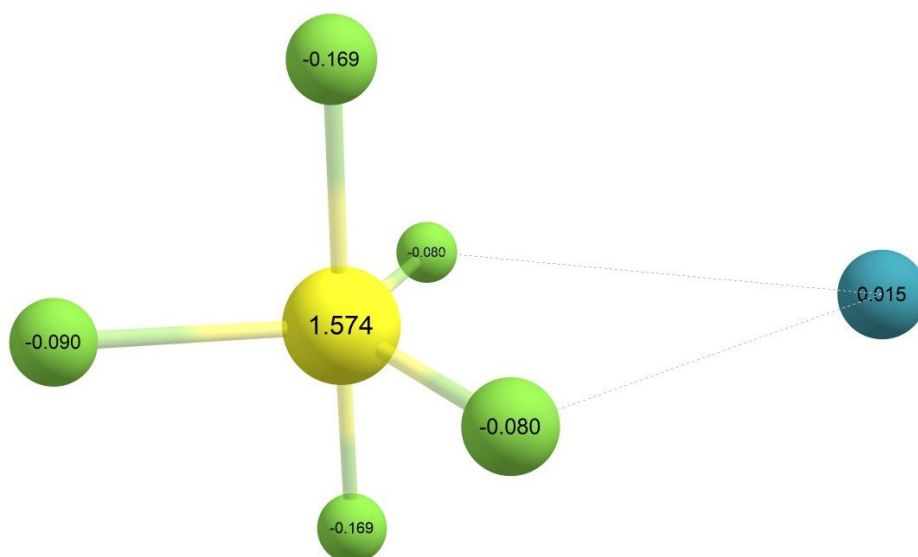

**Figure S8** – Mulliken charges in [XeSF<sub>5</sub>]<sup>+</sup> (Conformer 1) computed at the MP2/def2-TZVPP level.

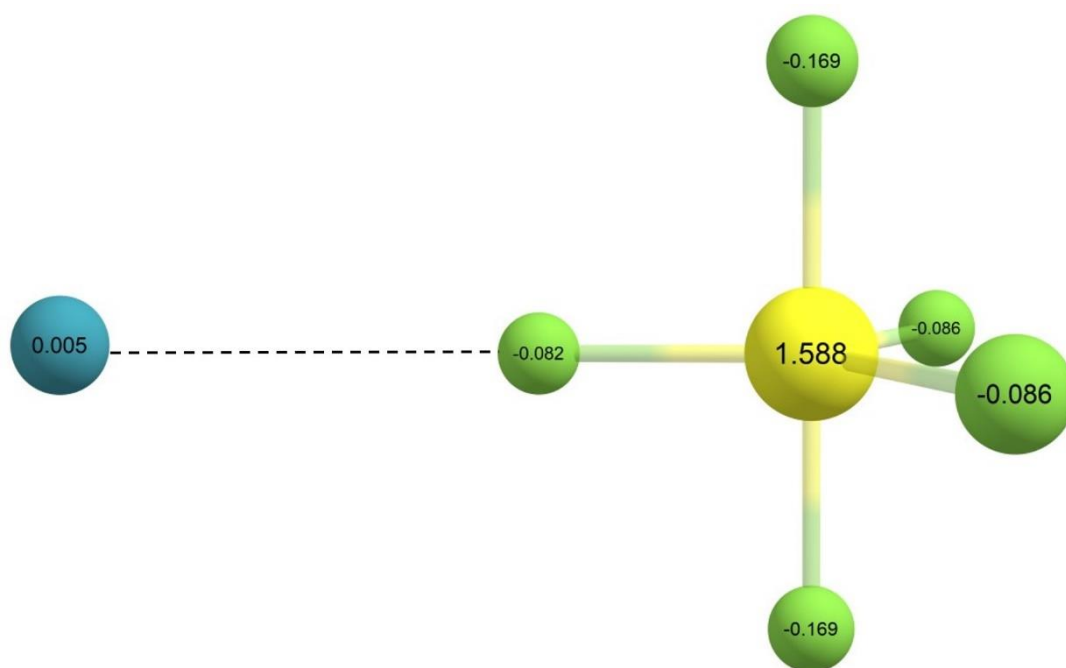

**Figure S9** – Mulliken charges in [XeSF<sub>5</sub>]<sup>+</sup> (Conformer 2) computed at the MP2/def2-TZVPP level.



**Table S2** – Enthalpies and Gibbs energies of reaction (kcal/mol) computed by MP2 and BCCD(T) methods for  $\text{Ng}^+ + \text{SF}_6$ <sup>a</sup>

| Reaction                                                                     | MP2 <sup>b</sup> |         |                  |        | BCCD(T) <sup>c</sup> |        |                  |        |
|------------------------------------------------------------------------------|------------------|---------|------------------|--------|----------------------|--------|------------------|--------|
|                                                                              | $\Delta\text{H}$ |         | $\Delta\text{G}$ |        | $\Delta\text{H}$     |        | $\Delta\text{G}$ |        |
|                                                                              | Conf. 1          | Conf. 2 | Conf. 1          | Conf.2 | Conf. 1              | Conf.2 | Conf. 1          | Conf.2 |
| $\text{Kr}^+ + \text{SF}_6 \rightarrow \text{KrSF}_6^+$                      | -17.4            | -17.4   | 12.9             | 12.9   | -18.0                | -18.0  | 12.3             | 12.3   |
| $\text{KrSF}_6^+ \rightarrow \text{Kr}\cdots\text{SF}_5^+ + \text{F}$        | 16.4             | 17.4    | -17.8            | -17.9  | 15.0                 | 16.0   | -19.1            | -19.3  |
| $\text{Kr}\cdots\text{SF}_5^+ \rightarrow \text{Kr} + \text{SF}_5^+$         | 4.1              | 3.1     | -15.3            | -15.2  | 3.2                  | 2.2    | -16.3            | -16.1  |
| $\text{Kr}^+ + \text{SF}_6 \rightarrow \text{Kr} + \text{SF}_5^+ + \text{F}$ | 3.1              | 3.1     | -20.2            | -20.2  | 0.2                  | 0.2    | -23.1            | -23.1  |
| $\text{Xe}^+ + \text{SF}_6 \rightarrow \text{XeSF}_6^+$                      | -9.8             | -9.8    | 20.0             | 20.0   | -11.7                | -11.7  | 18.1             | 18.1   |
| $\text{XeSF}_6^+ \rightarrow \text{Xe}\cdots\text{SF}_5^+ + \text{F}$        | 47.1             | 48.3    | 13.5             | 13.5   | 46.4                 | 47.5   | 12.7             | 12.7   |
| $\text{Xe}\cdots\text{SF}_5^+ \rightarrow \text{Xe} + \text{SF}_5^+$         | 4.7              | 3.5     | -14.8            | -14.8  | 3.7                  | 2.6    | -15.6            | -15.6  |
| $\text{Xe}^+ + \text{SF}_6 \rightarrow \text{Xe} + \text{SF}_5^+ + \text{F}$ | 42.0             | 42.0    | 18.7             | 18.7   | 38.4                 | 38.4   | 15.2             | 15.2   |

<sup>a</sup>  $\Delta\text{H}$  and  $\Delta\text{G}$  were computed at  $T = 298.15$  K and the entropy was corrected for a pressure of  $10^{-7}$  Torr ( $S_2 = S_1 - R\ln(P_2/P_1)$ ).

<sup>b</sup> Basis set def2-TZVPP. <sup>c</sup> Basis set cc-pVTZ.

**Table S3** – Thermochemical calculations for  $\text{HXF}_n^+ \rightarrow \text{XF}_{n-1}^+ + \text{HF}$  (X = S, n = 6; X = N, n = 3; X = Si, n = 4)

| Reaction                                                                    | $\Delta\text{H}$ (kcal/mol)                                                                                                                                                                          |                      |
|-----------------------------------------------------------------------------|------------------------------------------------------------------------------------------------------------------------------------------------------------------------------------------------------|----------------------|
|                                                                             | [ $\Delta\text{H} = \text{AE}(\text{XF}_{n-1}^+/\text{XF}_n) + \text{PA}(\text{XF}_n) + \Delta_f\text{H}^\circ(\text{HF}) - \Delta_f\text{H}^\circ(\text{F}) - \Delta_f\text{H}^\circ(\text{H}^+) ]$ |                      |
| $\text{HSF}_6^+ \rightarrow \text{SF}_5^+ + \text{HF}$<br>(X = S, n = 6)    | $-5.2 \pm 4.8$                                                                                                                                                                                       |                      |
| $\text{HNF}_3^+ \rightarrow \text{NF}_2^+ + \text{HF}$<br>(X = N, n = 3)    | $10.6 \pm 1.9$                                                                                                                                                                                       |                      |
| $\text{HSiF}_4^+ \rightarrow \text{SiF}_4^+ + \text{HF}$<br>(X = Si, n = 4) | $24.9 \pm 4.6$                                                                                                                                                                                       |                      |
| Data (kcal/mol) <sup>a</sup>                                                | AE(XF <sub>n-1</sub> <sup>+</sup> /XF <sub>n</sub> )                                                                                                                                                 | PA(XF <sub>n</sub> ) |
| X = S                                                                       | $308.6 \pm 4.4^b$                                                                                                                                                                                    | $137.5 \pm 1.9^c$    |
| X = N                                                                       | $326.0 \pm 0.2^d$                                                                                                                                                                                    | $135.9 \pm 1.9^c$    |
| X = Si                                                                      | $374.0 \pm 4.2^e$                                                                                                                                                                                    | $102.2 \pm 1.9^c$    |
| $\Delta_f\text{H}^\circ(\text{HF})$                                         | $-65.14 \pm 0.19^f$                                                                                                                                                                                  |                      |
| $\Delta_f\text{H}^\circ(\text{F})$                                          | $19.97 \pm 0.07^f$                                                                                                                                                                                   |                      |
| $\Delta_f\text{H}^\circ(\text{H}^+)$                                        | $367.17 \pm 0.01^f$                                                                                                                                                                                  |                      |

<sup>a</sup> T = 298.15 K.<sup>b</sup> E. R. Fisher, B. L. Kickel and P. B. Armentrout, *J. Chem. Phys.*, 1992, **97**, 4859-4870; converted to 298.15 K considering a difference of -0.94 kcal/mol between  $\Delta_f\text{H}^\circ(\text{SF}_5^+)$  [298.15 K] and  $\Delta_f\text{H}^\circ(\text{SF}_5^+)$  [0 K] in ref. f.<sup>c</sup> E. P. Hunter and S. G. Lias, *J. Phys. Chem. Ref. Data*, 1998, **27**, 413-656.<sup>d</sup> J. Berkowitz, J. P. Greene, J. Foropoulos Jr. and O. M. Nesković, *J. Chem. Phys.*, 1984, **81**, 6166-6175; in the absence of data for  $\text{NF}_2^+$  in ref. f, converted to 298.15 K considering a difference of +0.8 kcal/mol between  $\Delta_f\text{H}^\circ(\text{PF}_2^+)$  [298.15 K] and  $\Delta_f\text{H}^\circ(\text{PF}_2^+)$  [0 K] in ref. f.<sup>e</sup> B. L. Kickel, E. R. Fisher and P. B. Armentrout, *J. Phys. Chem.*, 1993, **97**, 10198-10203; converted to 298.15 K considering a difference of +0.23 kcal/mol between  $\Delta_f\text{H}^\circ(\text{SiF}_3^+)$  [298.15 K] and  $\Delta_f\text{H}^\circ(\text{SiF}_3^+)$  [0 K] in ref. f.<sup>f</sup> M. W. Chase, Jr., Ed., *NIST-JANAF Thermochemical Tables, 4th ed.*, *J. Phys. Chem. Ref. Data Monogr. 9*, AIP and ACS, New York, USA, 1998.

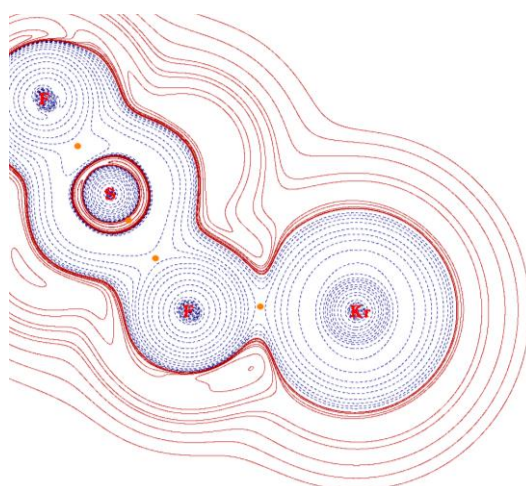

**Figure S10** – Energy density map of the  $[\text{KrSF}_6]^+$  species with (3,+1) Hamiltonian critical points signalled as orange dots.

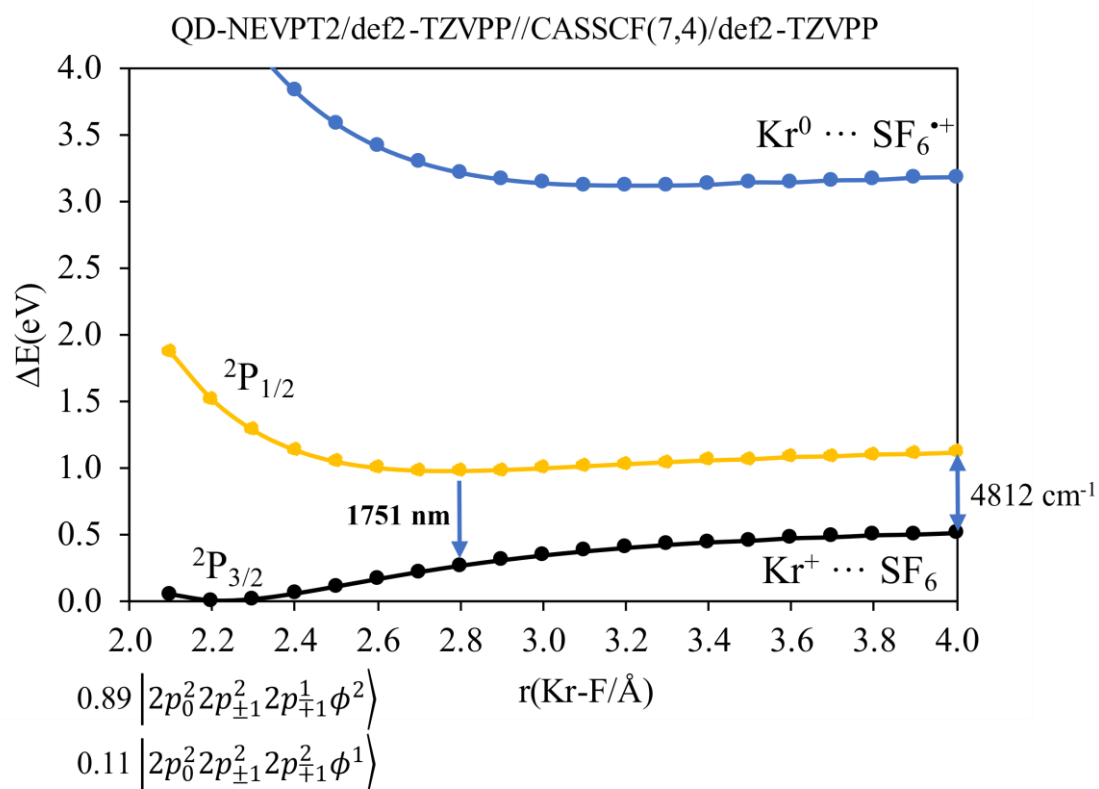

**Figure S11** – Potential energy surface map along with the Kr-F distance coordinate in  $[\text{KrSF}_6]^+$  including spin-orbit coupling. The dissociation limit agrees with the experimentally determined value of  $5370.1 \text{ cm}^{-1}$  (E. B. Saloman, *J. Phys. Chem. Ref. Data*, 2007, **36**, 215-386). The minimum in the “ $^2P_{1/2}$ ” surface lies at  $2.8 \text{ \AA}$ . A localised basis set was used throughout allowing for the determination of the extent of charge transfer at the equilibrium bond distance using two valence bond like configurations.
